# Supplementary material for: Efficacy and Safety of a Brain-Penetrant Biologic TNF-α Inhibitor in Aged APP/PS1 Mice
Source: MDPI journal article supplement (doi:10.3390/pharmaceutics14102200), 2022-10-16
Supplement: s1 [file s1]

## Supplemental Information

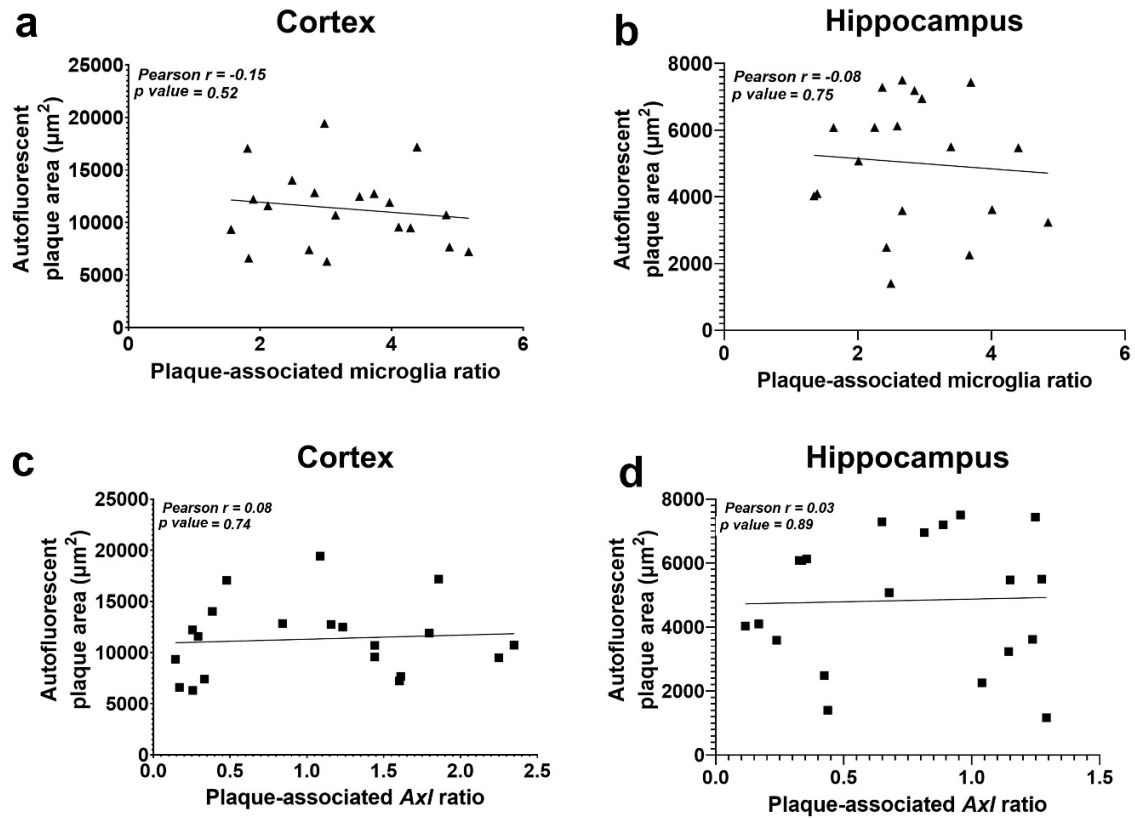

**Figure S1:** Scatter plots show no significant correlation between autofluorescent A $\beta$  plaque area and the plaque-associated microglia ratio in the cortex (**a**) and hippocampus (**b**) and plaque-associated Axl ratio in the cortex (**c**) and the hippocampus (**d**) for the biologic TNFI treated groups. Pearson correlation  $r$  was used for the analysis.
